# Supplementary material for: Facile generation of antibody heavy and light chain diversities for yeast surface display by Golden Gate Cloning
Source: publisher site journal article supplement (doi:10.1515/hsz-2018-0347), 2018-11-22
Supplement: Supplementary file 1 [file hsz-2018-0347_suppl.docx]

**Supplementary Information: Facile generation of antibody heavy and light chain diversities for yeast surface display by Golden Gate Cloning**

Lukas Roth1+, Julius Grzeschik1+, Steffen C. Hinz1, Stefan Becker2, Lars Toleikis2, Michael Busch3, Harald Kolmar1, Simon Krah2* and Stefan Zielonka2*

1Institute for Organic Chemistry and Biochemistry, Technische Universität Darmstadt, Alarich-Weiss-Strasse 4, D-64287 Darmstadt, Germany

2Protein Engineering and Antibody Technologies, Merck KGaA, Frankfurter Strasse 250, D-64293 Darmstadt, Germany

3Discovery Pharmacology, Merck KGaA, Frankfurter Strasse 250, D-64293 Darmstadt, Germany


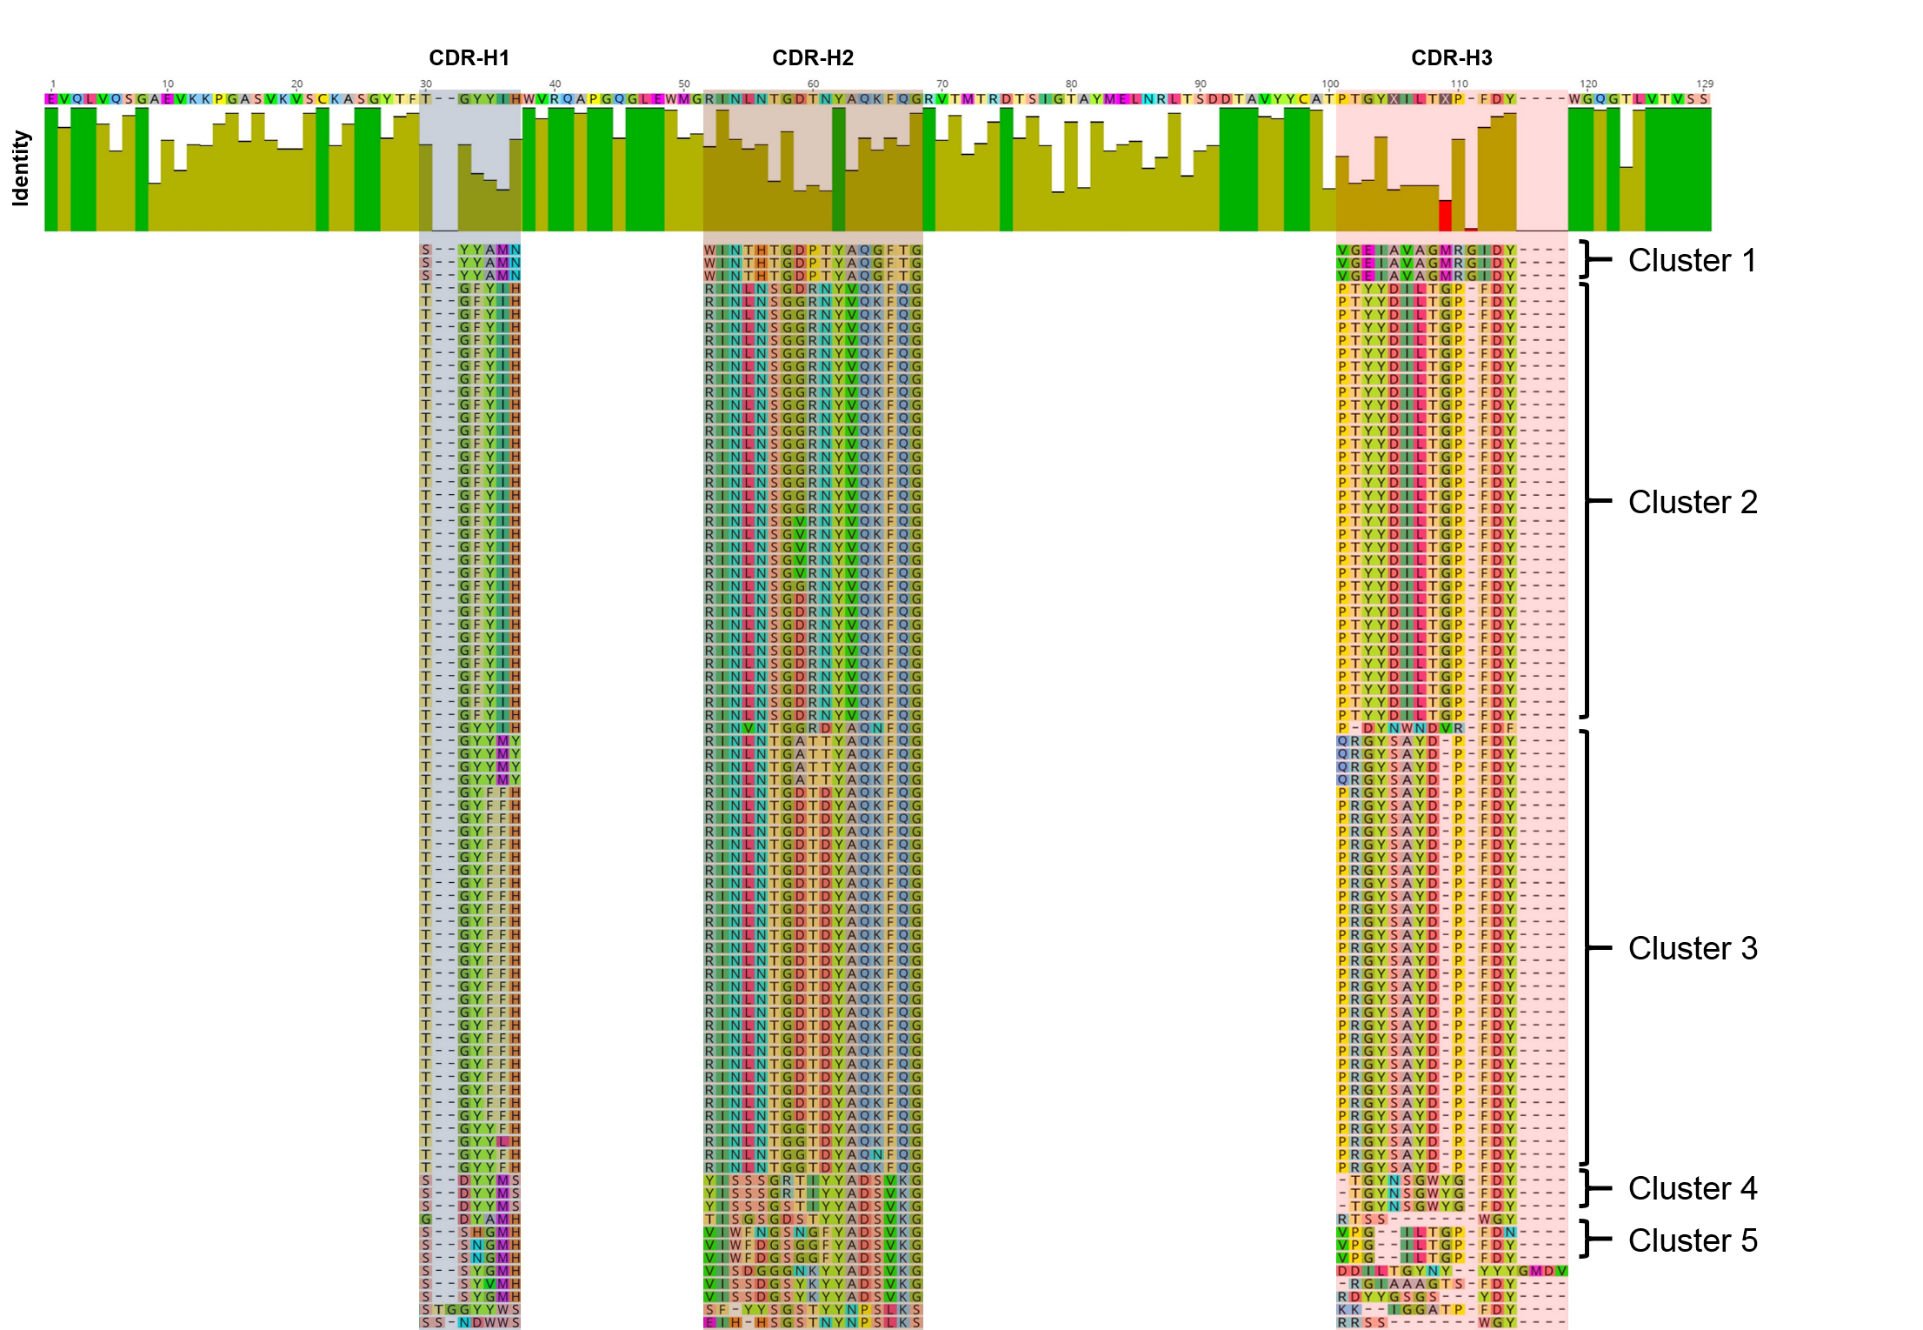


**Supplementary Figure 1:** Multiple sequence alignment of domain VH for GGC-derived library after enrichment against CEACAM6. CDR-H1, CDR-H2 and CDR-H3 are highlighted as well as clones falling into distinct sequence clusters. Alignment was performed using Geneious Alignment, Cost Matrix (1.0/0.0), Gap open penalty: 12, Gap extension penalty 3 and Refinement iterations 1 using Geneious 10.0.5 software ([www.geneious.com](http://www.geneious.com)).


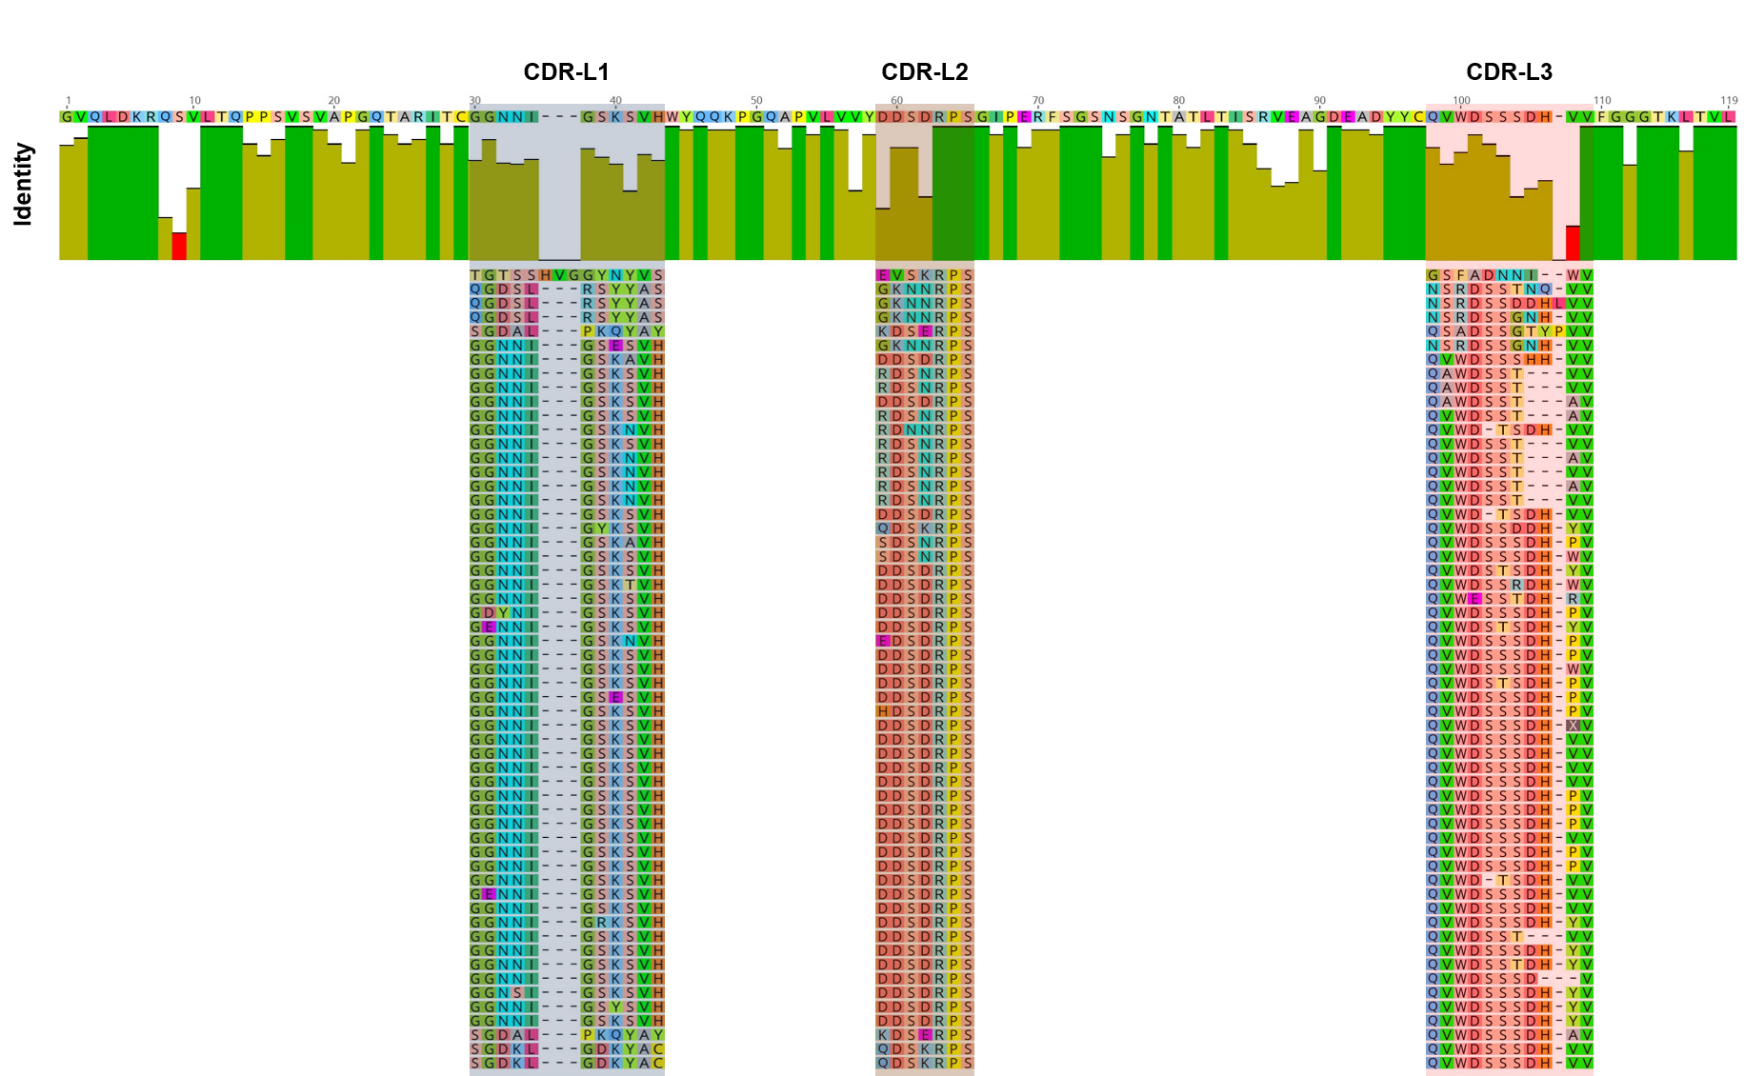


**Supplementary Figure 2:** Multiple sequence alignment of VLλ for GGC-derived library after enrichment against CEACAM6. CDR-L1, CDR-L2 and CDR-L3 are highlighted. Alignment was performed using Geneious Alignment, Cost Matrix (1.0/0.0), Gap open penalty: 12, Gap extension penalty 3 and Refinement iterations 1 using Geneious 10.0.5 software ([www.geneious.com](http://www.geneious.com)).


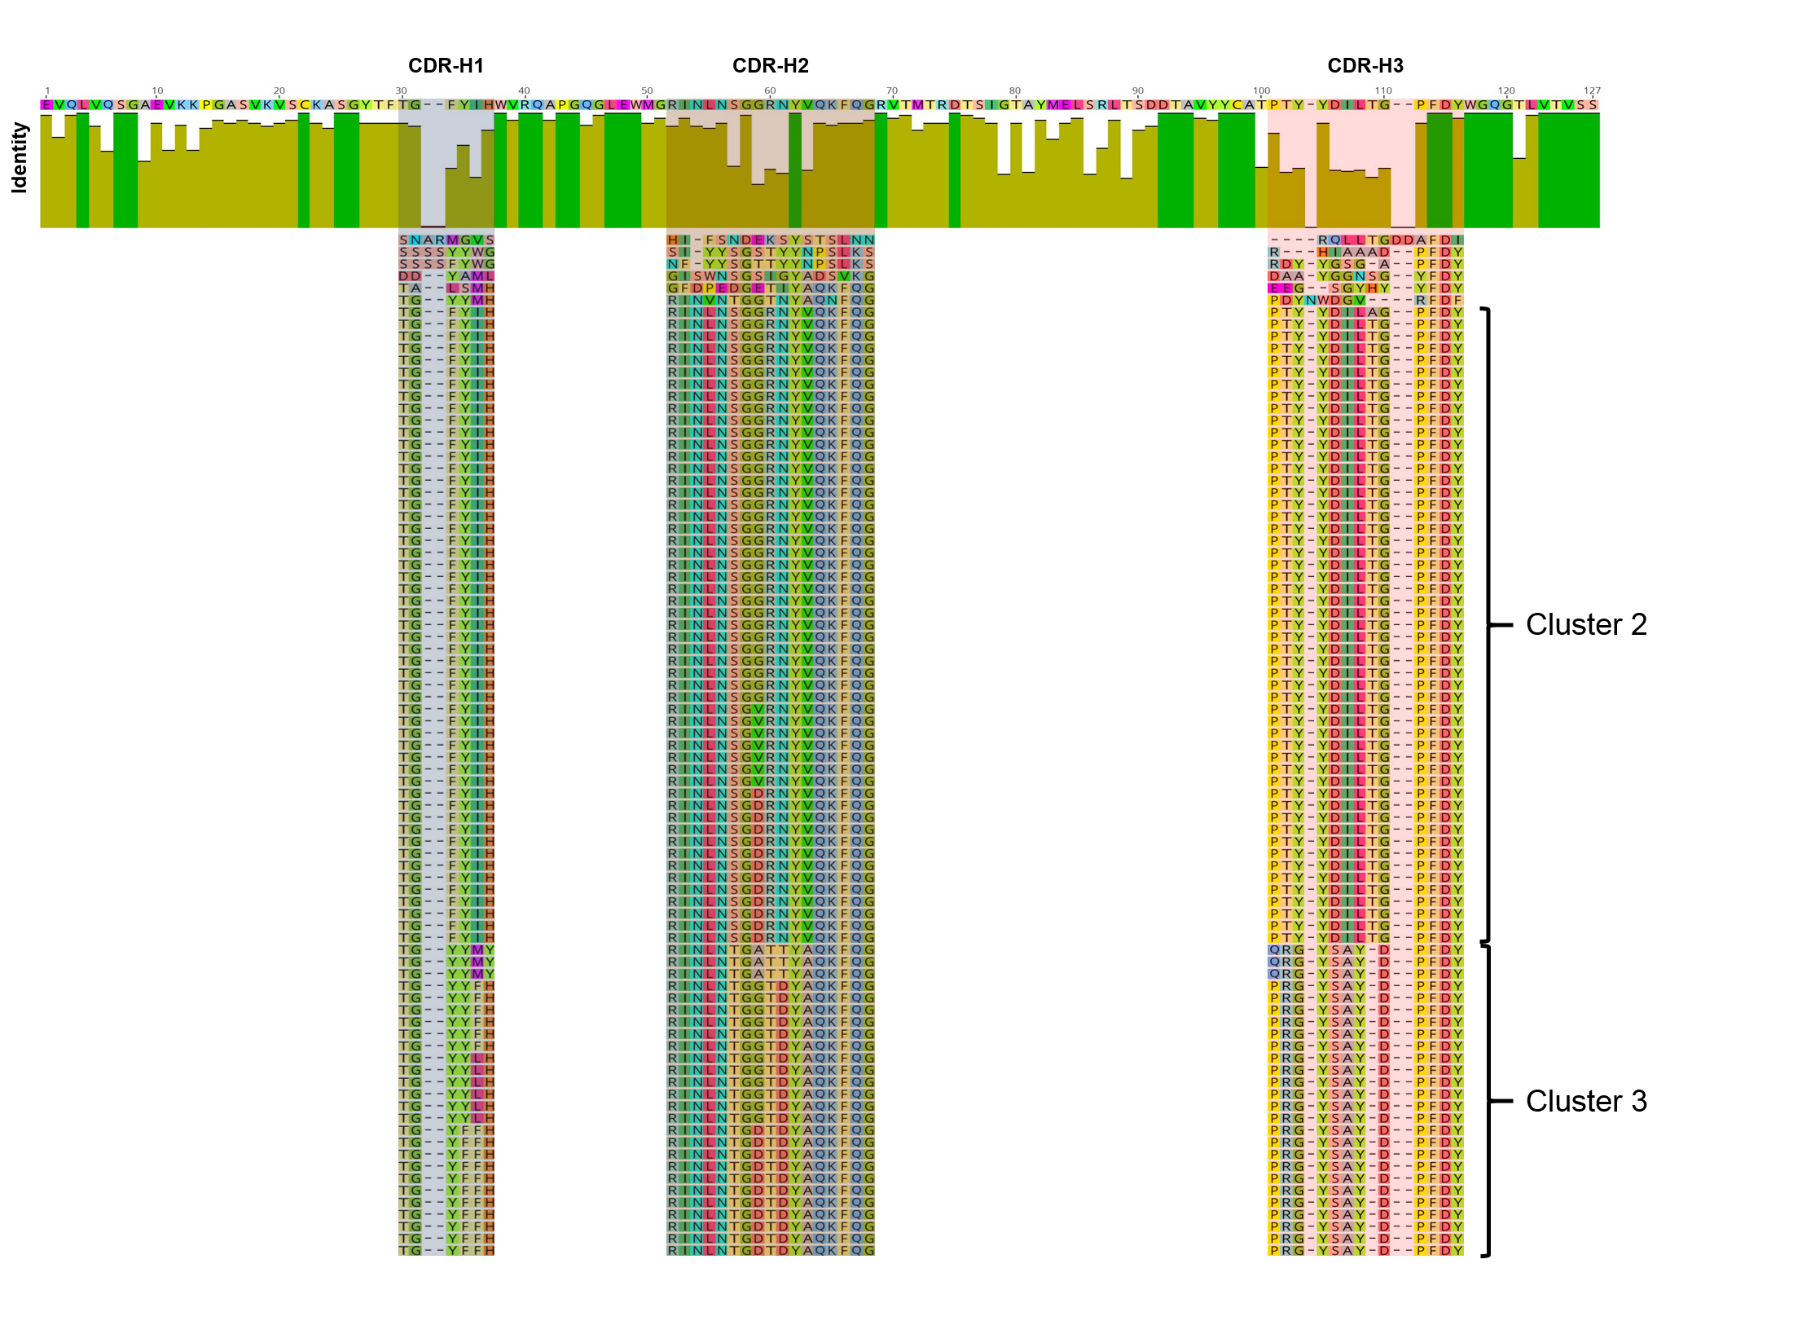


**Supplementary Figure 3:** Multiple sequence alignment of domain VH for YM-derived library after enrichment against CEACAM6. CDR-H1, CDR-H2 and CDR-H3 are highlighted as well as clones falling into distinct sequence clusters. Alignment was performed using Geneious Alignment, Cost Matrix (1.0/0.0), Gap open penalty: 12, Gap extension penalty 3 and Refinement iterations 1 using Geneious 10.0.5 software ([www.geneious.com](http://www.geneious.com)).


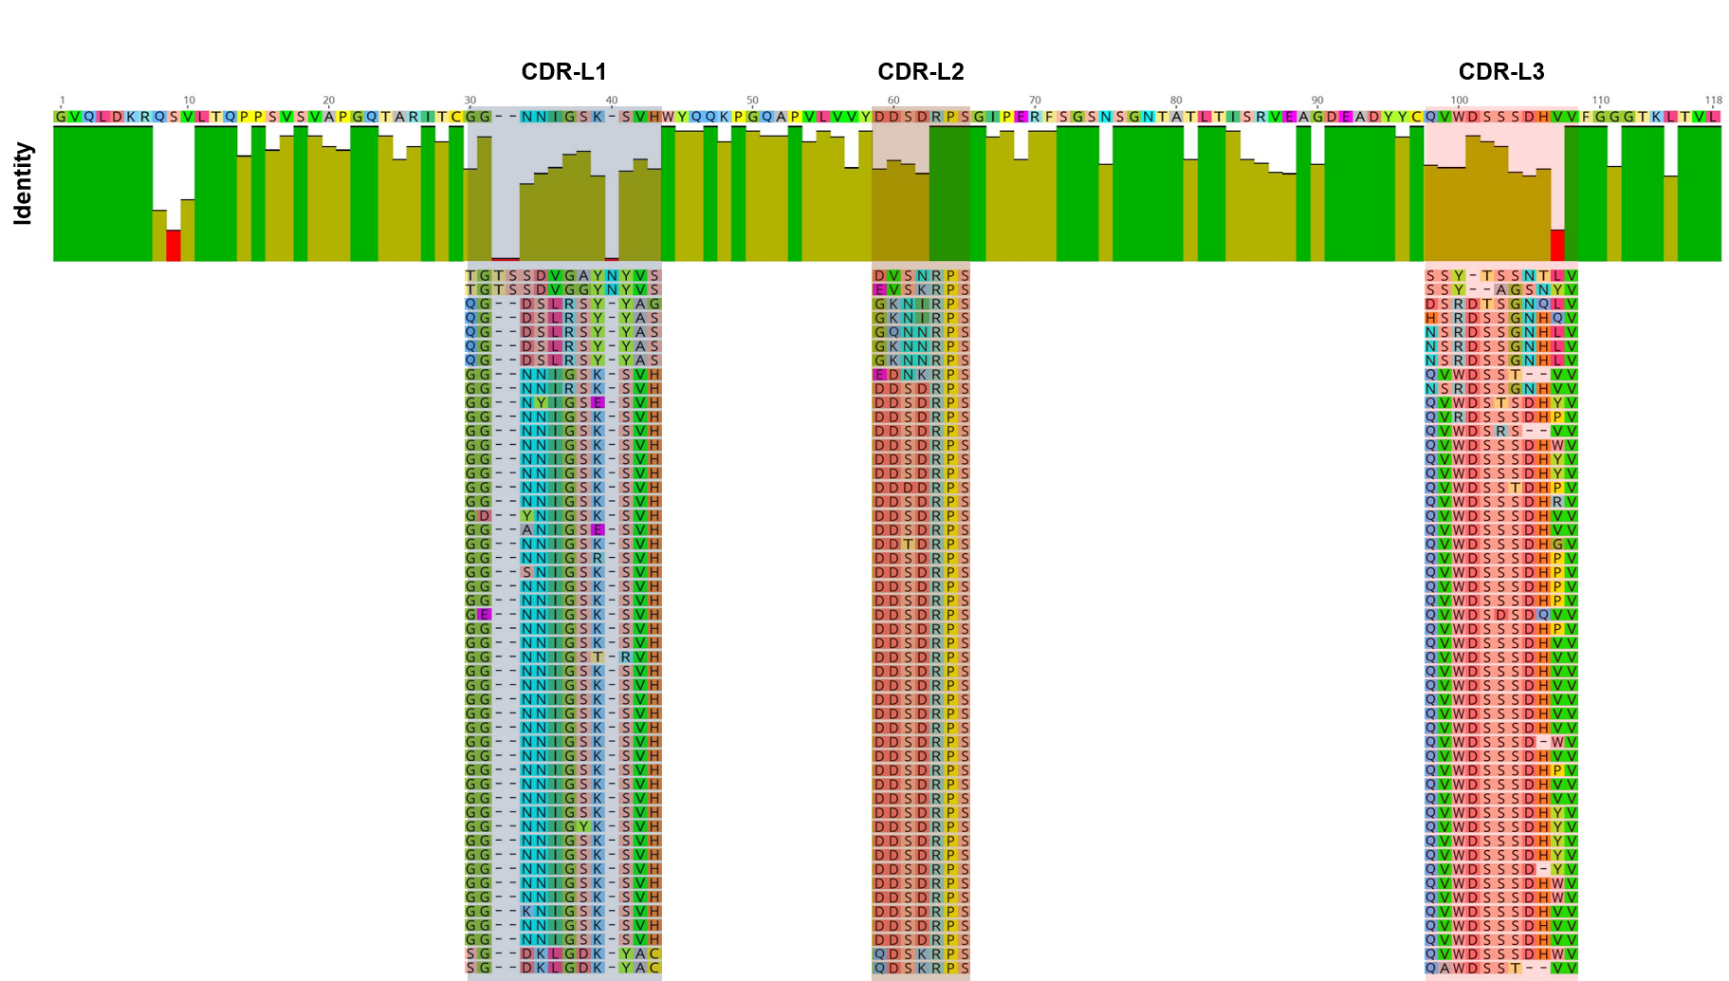


**Supplementary Figure 4:** Multiple sequence alignment of VLλ for YM-derived library after enrichment against CEACAM6. CDR-L1, CDR-L2 and CDR-L3 are highlighted. Alignment was performed using Geneious Alignment, Cost Matrix (1.0/0.0), Gap open penalty: 12, Gap extension penalty 3 and Refinement iterations 1 using Geneious 10.0.5 software ([www.geneious.com](http://www.geneious.com)).


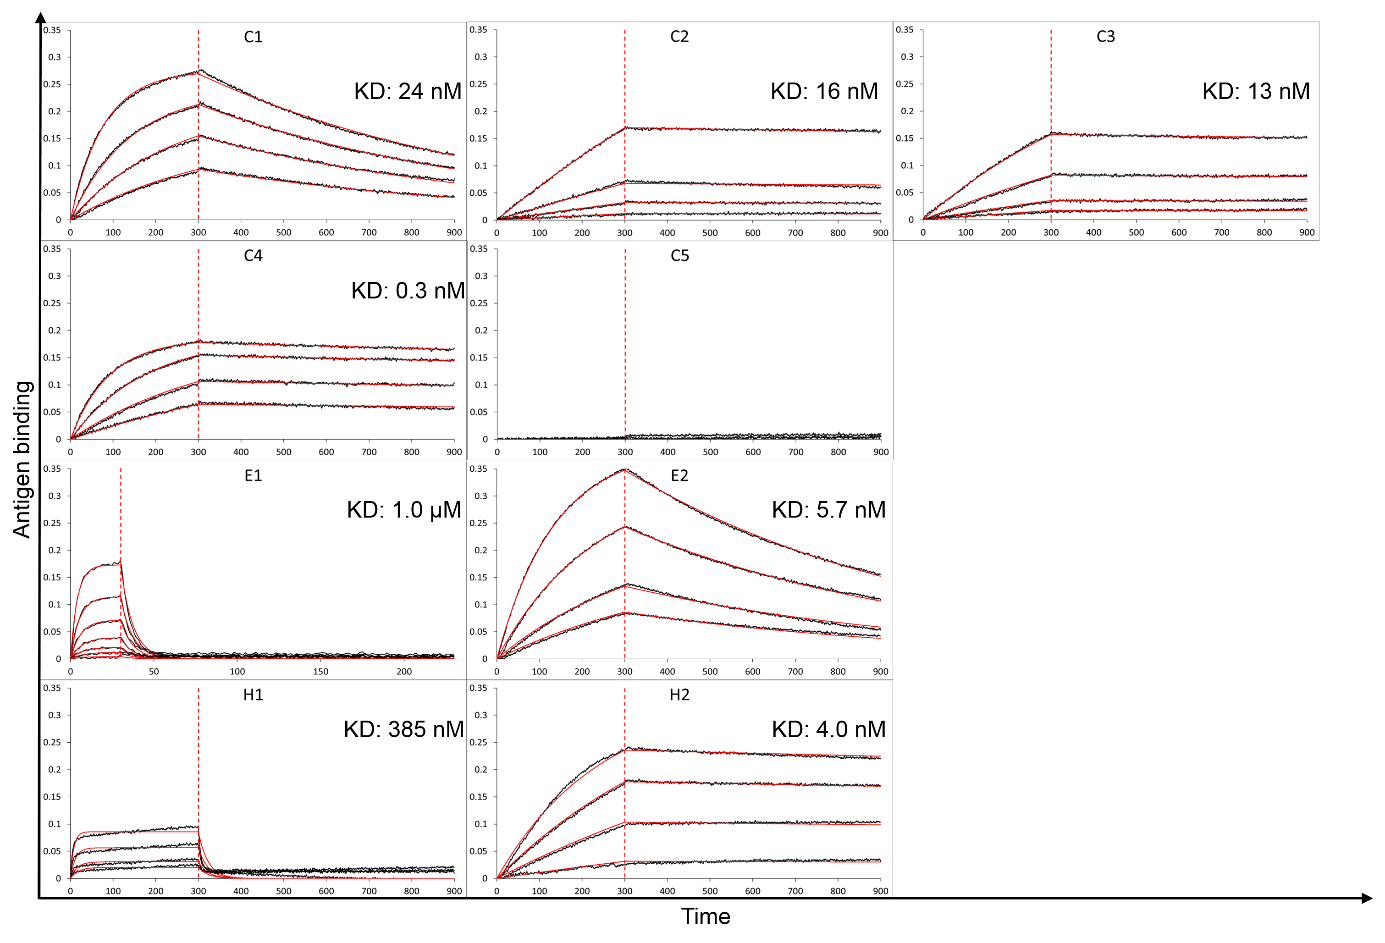


**Supplementary Figure 5:** Binding kinetics of human IgG variants (C1 – C5) and chimeric chicken/human IgG moieties (E1, E2, H1, H2) as determined by Bio-Layer Interferometry and an Octet® RED96 system. C1-C5: Cluster representatives selected against CEACAM6, E1, E2: Variants obtained from EGFR library, H1, H3: Molecules derived from hCG library sorting. Fitting (red lines) of binding curves (colored lines) was calculated using a 1:1 binding model and Savitzky-Golay filtering.


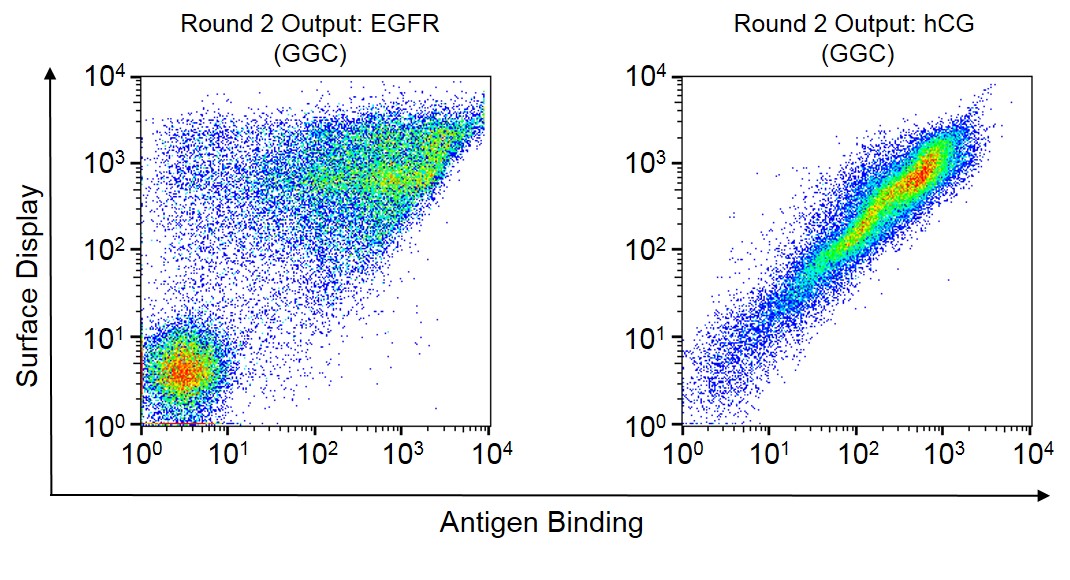


**Supplementary Figure 6:** Screening output of chimeric chicken/human YSD Fab immune libraries. Cells were stained after two rounds of sorting for antigen binding and Fab surface expression.


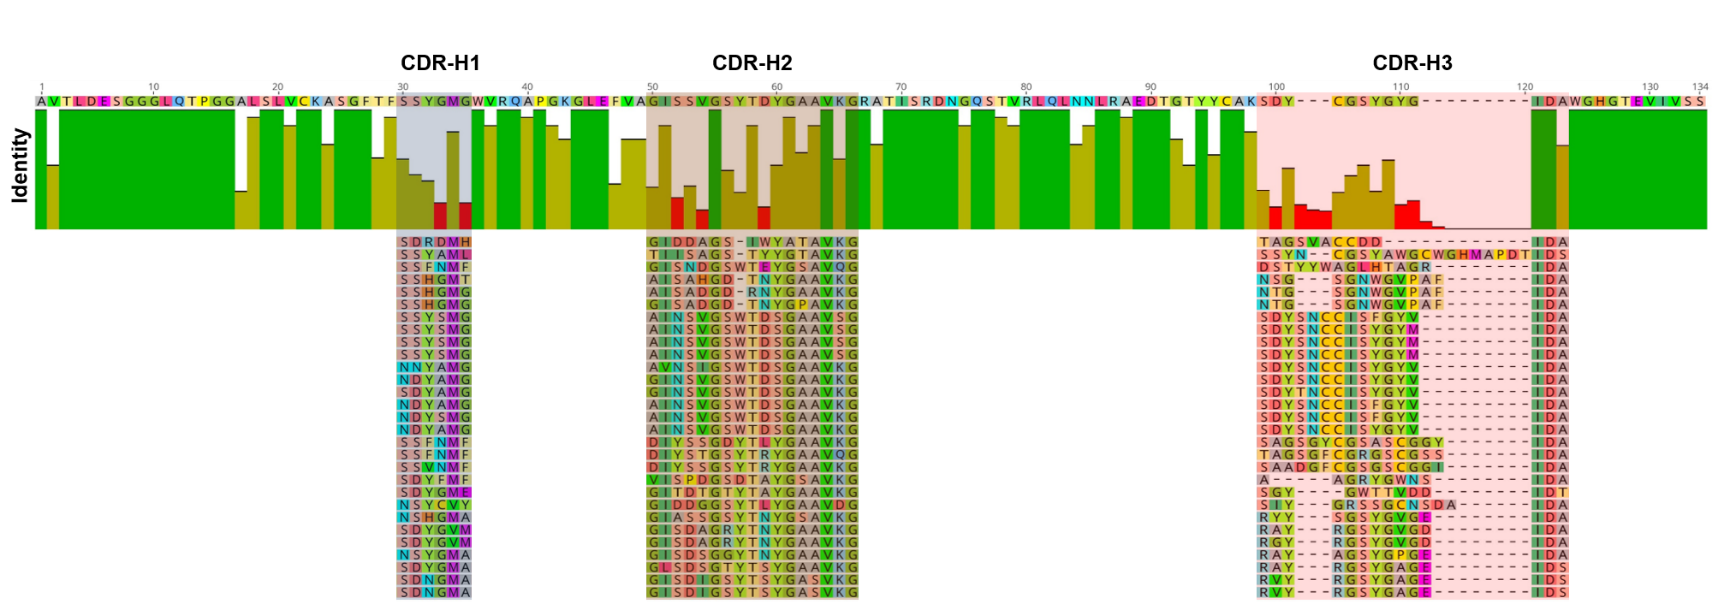


**Supplementary Figure 7:** Multiple sequence alignment of domain VH for GGC-derived chimeric chicken/human Fab library after enrichment against EGFR. CDR-H1, CDR-H2 and CDR-H3 are highlighted. Alignment was performed using Geneious Alignment, Cost Matrix (1.0/0.0), Gap open penalty: 12, Gap extension penalty 3 and Refinement iterations 1 using Geneious 10.0.5 software ([www.geneious.com](http://www.geneious.com)).


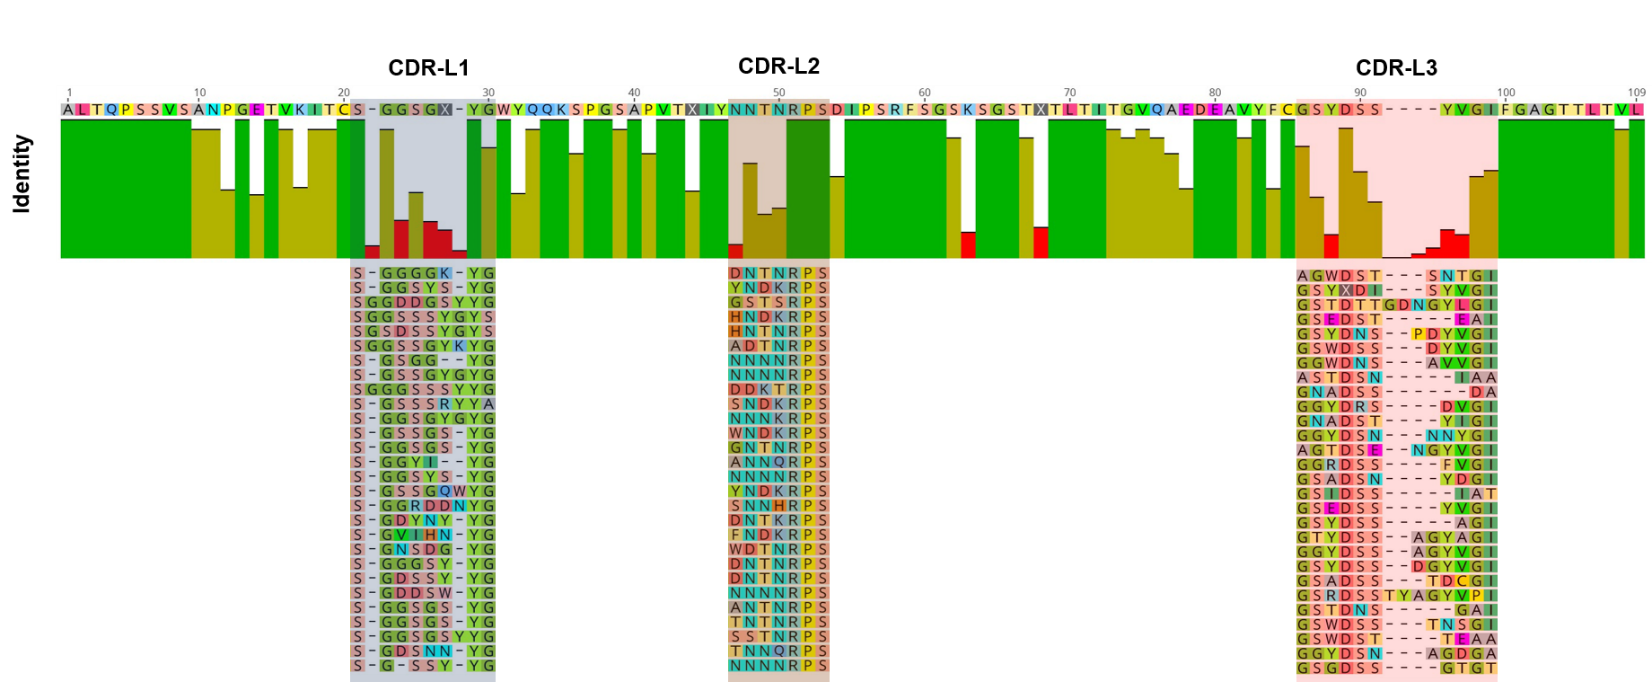


**Supplementary Figure 8:** Multiple sequence alignment of VL for GGC-derived chimeric chicken/human Fab library after enrichment against EGFR. CDR-L1, CDR-L2 and CDR-L3 are highlighted. Alignment was performed using Geneious Alignment, Cost Matrix (1.0/0.0), Gap open penalty: 12, Gap extension penalty 3 and Refinement iterations 1 using Geneious 10.0.5 software ([www.geneious.com](http://www.geneious.com)).


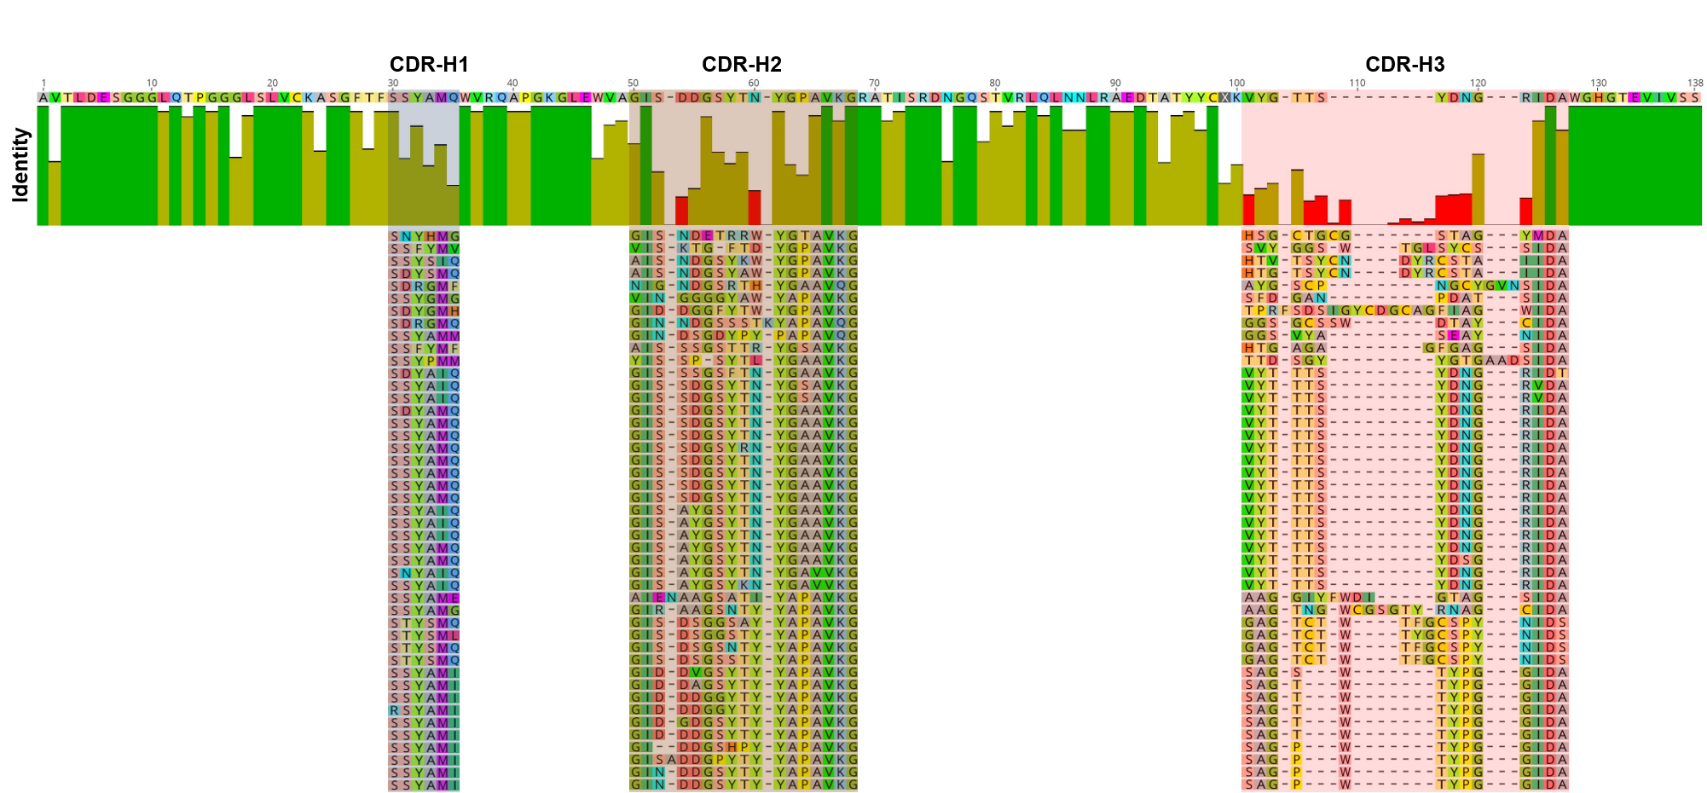


**Supplementary Figure 9:** Multiple sequence alignment of domain VH for GGC-derived chimeric chicken/human Fab library after enrichment against hCG. CDR-H1, CDR-H2 and CDR-H3 are highlighted. Alignment was performed using Geneious Alignment, Cost Matrix (1.0/0.0), Gap open penalty: 12, Gap extension penalty 3 and Refinement iterations 1 using Geneious 10.0.5 software ([www.geneious.com](http://www.geneious.com)).


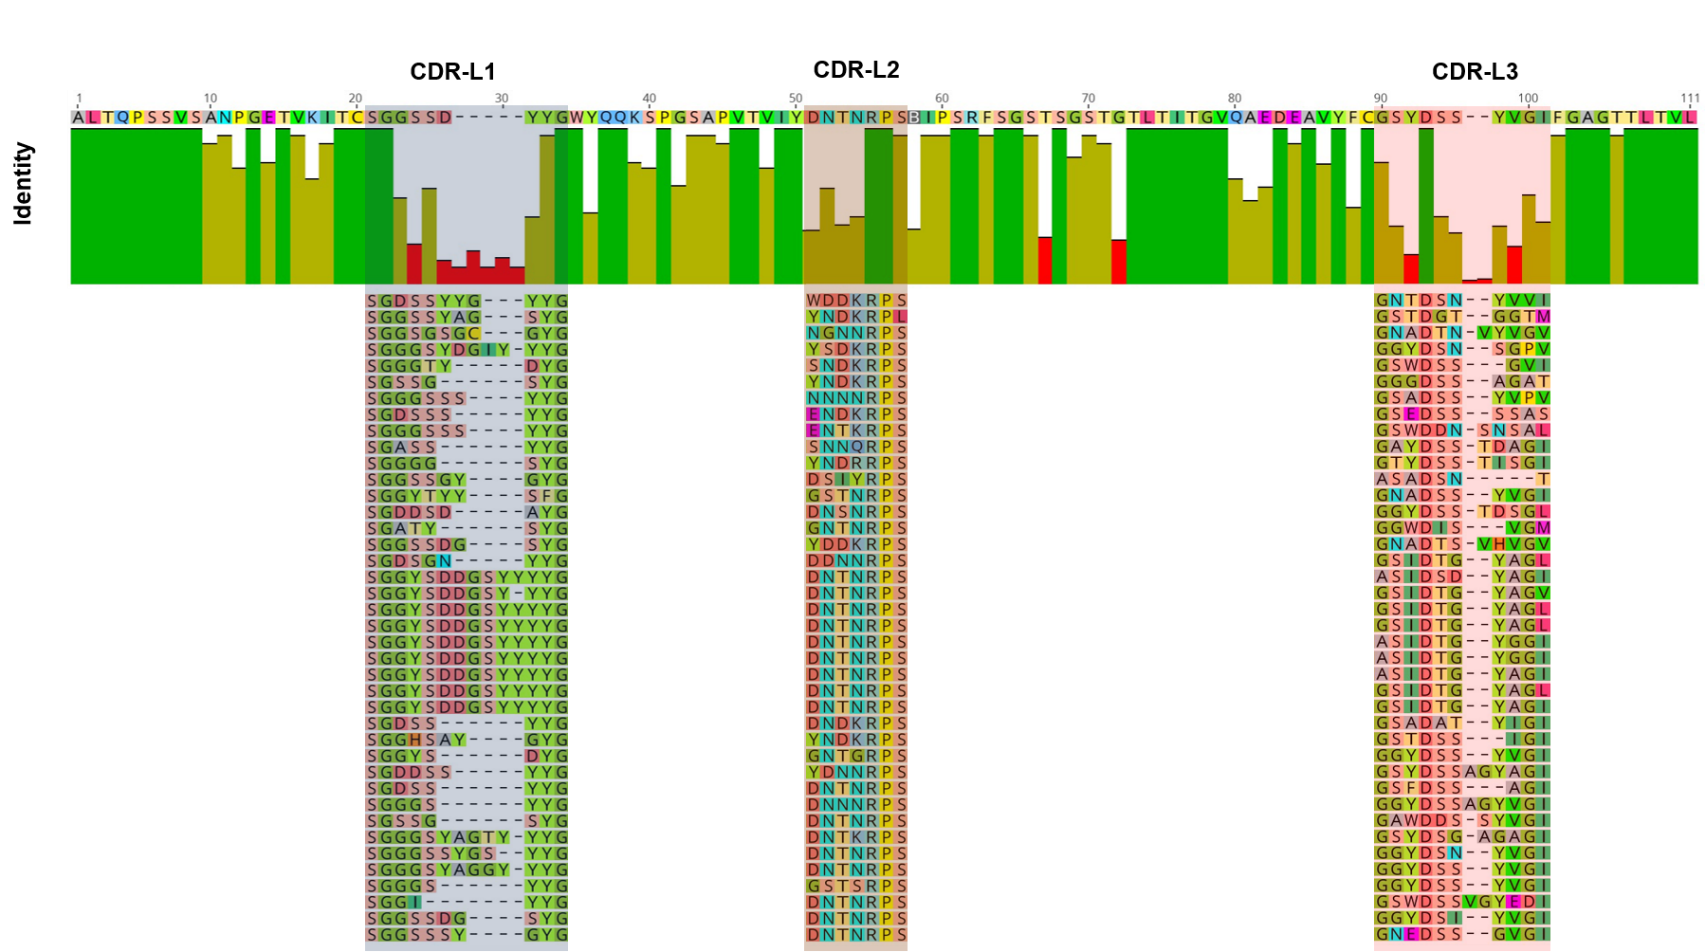


**Supplementary Figure 10:** Multiple sequence alignment of VL for GGC-derived chimeric chicken/human Fab library after enrichment against hCG. CDR-L1, CDR-L2 and CDR-L3 are highlighted. Alignment was performed using Geneious Alignment, Cost Matrix (1.0/0.0), Gap open penalty: 12, Gap extension penalty 3 and Refinement iterations 1 using Geneious 10.0.5 software ([www.geneious.com](http://www.geneious.com)).

**Supplementary Table 1:** Comparison of the functionality of VH and VL clones in YSD libraries constructed by GGC or the YM approach.

| **Library** | **Functionality [%]** | |
| --- | --- | --- |
| **VH repertoire** | **VLλ repertoire** |
| Golden Gate Cloning (GGC) | 90.4 | 78.8 |
| Conventional (YM) | 92.1 | 73.2 |

**Supplementary Table 2:** Oligonucleotide primers used in this study.

| Name | Sequence (5′–3′) |
| --- | --- |
| 1GGC_VH_up | | GCGCGCGCGGTCTCTAGGTGAGGTBCAGCTGGTGCAGTCTGG | | --- | |
| 2GGC_VH_up | GCGCGCGCGGTCTCTAGGTGARRTSCAGCTGGTRCARTCTGG |
| 3GGC_VH_up | GCGCGCGCGGTCTCTAGGTGAGRTCACCTTGAAGGAGTCTGG |
| 4GGC_VH_up | GCGCGCGCGGTCTCTAGGTGARGTGCAGCTGGTGGAGTCTGG |
| 5GGC_VH_up | GCGCGCGCGGTCTCTAGGTGAGGTGCAGCTGKTGGAGWCYSG |
| 6GGC_VH_up | GCGCGCGCGGTCTCTAGGTGAGGTGCARCTGCAGGAGTCGGG |
| 7GGC_VH_up | GCGCGCGCGGTCTCTAGGTGAGSTGCAGCTRCAGSAGTSSGG |
| 8GGC_VH_up | GCGCGCGCGGTCTCTAGGTGARGTGCAGCTGGTGCAGTCTGG |
| 9GGC_VH_up | GCGCGCGCGGTCTCTAGGTGAGGTACAGCTGCAGCAGTCAGG |
| 1GGC_VH_lo | GCGCGCTGGTCTCTTAGTAGAAGCTGARGAGACRGTGACC |
| 1GGC_VL_up | GCGCGCTGGTCTCTAAGCGACAGTCTGTGCTGACTCAGCCACC |
| 2GGC_VL_up | GCGCGCTGGTCTCTAAGCGACAGTCTGTGYTGACGCAGCCGCC |
| 3GGC_VL_up | GCGCGCTGGTCTCTAAGCGACAGTCTGCCCTGACTCAGCCT |
| 4GGC_VL_up | GCGCGCTGGTCTCTAAGCGATCCTATGWGCTGACWCAGCCACC |
| 5GGC_VL_up | GCGCGCTGGTCTCTAAGCGATCTTCTGAGCTGACTCAGGACCC |
| 6GGC_VL_up | GCGCGCTGGTCTCTAAGCGACTGCCTGTGCTGACTCAGCCC |
| 7GGC_VL_up | GCGCGCTGGTCTCTAAGCGACAGCYTGTGCTGACTCAATCRYC |
| 8GGC_VL_up | GCGCGCTGGTCTCTAAGCGACAGSCTGTGCTGACTCAGCC |
| 9GGC_VL_up | GCGCGCTGGTCTCTAAGCGAAATTTTATGCTGACTCAGCCCCA |
| 10GGC_VL_up | GCGCGCTGGTCTCTAAGCGACAGRCTGTGGTGACYCAGGAGCC |
| 11GGC_VL_up | GCGCGCTGGTCTCTAAGCGACAGSCWGKGCTGACTCAGCCACC |
| 1GGC_VL_lo | GCGCGCGGTCTCTGTCCTAGGACGGTSASCTTG |
| 1YM_VH_up | TGTTTTTCAATATTTTCTGTTATTGCTAGCGTTTTAGCAGGGGAGGTBCAGCTGGTGCAGTCTGG |
| 2YM_VH_up | TGTTTTTCAATATTTTCTGTTATTGCTAGCGTTTTAGCAGGGGARRTSCAGCTGGTRCARTCTGG |
| 3YM_VH_up | TGTTTTTCAATATTTTCTGTTATTGCTAGCGTTTTAGCAGGGGAGRTCACCTTGAAGGAGTCTGG |
| 4YM_VH_up | TGTTTTTCAATATTTTCTGTTATTGCTAGCGTTTTAGCAGGGGARGTGCAGCTGGTGGAGTCTGG |
| 5YM_VH_up | TGTTTTTCAATATTTTCTGTTATTGCTAGCGTTTTAGCAGGGGAGGTGCAGCTGKTGGAGWCYSG |
| 6YM_VH_up | TGTTTTTCAATATTTTCTGTTATTGCTAGCGTTTTAGCAGGGGAGGTGCARCTGCAGGAGTCGGG |
| 7YM_VH_up | TGTTTTTCAATATTTTCTGTTATTGCTAGCGTTTTAGCAGGGGAGSTGCAGCTRCAGSAGTSSGG |
| 8YM_VH_up | TGTTTTTCAATATTTTCTGTTATTGCTAGCGTTTTAGCAGGGGARGTGCAGCTGGTGCAGTCTGG |
| 9YM_VH_up | TGTTTTTCAATATTTTCTGTTATTGCTAGCGTTTTAGCAGGGGAGGTACAGCTGCAGCAGTCAGG |
| 1YM_VH_lo | GGAGGAGGGTGCCAGGGGGAAGACCGATGGGCCCTTGGTACTAGCTGARGAGACRGTGACC |
| 1YM_VL_up | GCCAGCATTGCTGCTAAAGAAGAAGGGGTACAACTCGATAAAAGACAGTCTGTGCTGACTCAGCCACC |
| 2YM_VL_up | GCCAGCATTGCTGCTAAAGAAGAAGGGGTACAACTCGATAAAAGACAGTCTGTGYTGACGCAGCCGCC |
| 3YM_VL_up | GCCAGCATTGCTGCTAAAGAAGAAGGGGTACAACTCGATAAAAGACAGTCTGCCCTGACTCAGCCT |
| 4YM_VL_up | GCCAGCATTGCTGCTAAAGAAGAAGGGGTACAACTCGATAAAAGATCCTATGWGCTGACWCAGCCACC |
| 5YM_VL_up | GCCAGCATTGCTGCTAAAGAAGAAGGGGTACAACTCGATAAAAGATCTTCTGAGCTGACTCAGGACCC |
| 6YM_VL_up | GCCAGCATTGCTGCTAAAGAAGAAGGGGTACAACTCGATAAAAGACTGCCTGTGCTGACTCAGCCC |
| 7YM_VL_up | GCCAGCATTGCTGCTAAAGAAGAAGGGGTACAACTCGATAAAAGACAGCYTGTGCTGACTCAATCRYC |
| 8YM_VL_up | GCCAGCATTGCTGCTAAAGAAGAAGGGGTACAACTCGATAAAAGACAGSCTGTGCTGACTCAGCC |
| 9YM_VL_up | GCCAGCATTGCTGCTAAAGAAGAAGGGGTACAACTCGATAAAAGAAATTTTATGCTGACTCAGCCCCA |
| 10YM_VL_up | GCCAGCATTGCTGCTAAAGAAGAAGGGGTACAACTCGATAAAAGACAGRCTGTGGTGACYCAGGAGCC |
| 11YM_VL_up | GCCAGCATTGCTGCTAAAGAAGAAGGGGTACAACTCGATAAAAGACAGSCWGKGCTGACTCAGCCACC |
| 1YM_VL_lo | GGATGGCGGGAACAGAGTGACCGAAGGGGCGGCCTTCGGCTGACCTAGGACGGTSASCTTG |
| 1chic_chim_VH_up | GCGCGCGCGGTCTCTAGGTgccgtgacgttggacgag |
| 2chic_chim_VH_up | GCGCGCGCGGTCTCTAGGTGCCCTGACGTTGGACGAG |
| 1chic_chim_VH_lo | GCGCGCTGGTCTCTTAGTAGAAGCggaggagacgatgacttcggt |
| 1chic_chim_VL_up | GCGCGCTGGTCTCTAAGCGAGCGCTGACTCAGCCGTCCTCG |
| 1chic_chim_VL_lo | GCGCGCGGTCTCTGTCCtaggacggtcagggttgtccc |
